# Supplementary material for: GLP-1 Receptor Agonists and Colorectal Cancer Risk in Drug-Naive Patients With Type 2 Diabetes, With and Without Overweight/Obesity
Source: PubMed Central journal article supplement (PMC10704339; doi:10.1001/jamaoncol.2023.5573), 2023-12-07
Supplement: jamaoncol-e235573-s002.pdf [file jamaoncol-e235573-s002.pdf]

## Data Sharing Statement

Wang. GLP-1 Receptor Agonists and Colorectal Cancer Risk in Drug-Naive Patients With Type 2 Diabetes, With and Without Overweight/Obesity. *JAMA Oncol.* Published December 07, 2023. doi:10.1001/jamaoncol.2023.5573

### Data

**Data available:** No

### Additional Information

**Explanation for why data not available:** This study used population-level aggregate and de-identified data generated by the TriNetX Platform. Due to data privacy, patient-level data was not used and cannot be shared.
